# Supplementary material
Source: PubMed Central journal article supplement (PMC6365831)
Supplement: ccfe98664ce5c2f12faa8dbfd7f55f30_AEM.02662-18-s0001.pdf [file ccfe98664ce5c2f12faa8dbfd7f55f30_AEM.02662-18-s0001.pdf]

1 **Supplementary materials**

2  
3 **Induction of a toxin-antitoxin gene cassette under high hydrostatic pressure**  
4 **enables markerless gene disruption in the hyperthermophilic archaeon**

5 *Pyrococcus yayanosii*

6  
7 **Qinghao Song<sup>1,2</sup>, Zhen Li<sup>1,2</sup>, Rouke Chen<sup>1,2</sup>, Xiaopan Ma<sup>1,2</sup>, Xiang Xiao<sup>1,2,3</sup>,**  
8 **Jun Xu<sup>1,2,3\*</sup>**

9  
10 <sup>1</sup> Institute of Oceanography, Shanghai Jiao Tong University, Shanghai 200240; <sup>2</sup> State  
11 Key Laboratory of Microbial Metabolism, School of Life Science and Biotechnology,  
12 Shanghai Jiao Tong University, Shanghai 200240; <sup>3</sup> State Key Laboratory of Ocean  
13 Engineering, Shanghai Jiao Tong University, Shanghai 200240.

14 **\*Correspondence:** xujunn@sjtu.edu.cn  
15

16

**Table S1 Type II TA systems in *P. yayanosii* were identified using TAFinder<sup>a</sup>**

17

**Sequence Name:** *Pyrococcus yayanosii* CH1 chromosome, complete genome

| #  | T/A <sup>b</sup> | Locus tag  | Location         | Len (a.a.) | Strand | Family    | Domain    | Score_TA |
|----|------------------|------------|------------------|------------|--------|-----------|-----------|----------|
| 1  | T                | PYCH_04900 | 408569..409093   | 174        | +      | -         | pfam13420 | 9.46     |
|    | A                | PYCH_04890 | 408024..408449   | 141        | +      | -         | cd00090   |          |
| 2  | T                | PYCH_05070 | 419237..419434   | 65         | -      | MNT-like  | -         | 60.21    |
|    | A                | PYCH_05080 | 419440..419589   | 49         | -      | HEPN-like | -         |          |
| 3  | T                | PYCH_05650 | 472157..472528   | 123        | -      | vapC      | cd09981   | 86.63    |
|    | A                | PYCH_05660 | 472498..472728   | 76         | -      | vapB      | COG1753   |          |
| 4  | T                | PYCH_13120 | 1152428..1153837 | 469        | +      | -         | pfam00583 | 8.39     |
|    | A                | PYCH_13110 | 1151801..1152361 | 186        | +      | -         | cd00090   |          |
| 5  | T                | PYCH_13440 | 1178632..1179141 | 169        | +      | -         | COG1246   | 4.70     |
|    | A                | PYCH_13430 | 1177992..1178504 | 170        | +      | -         | cd00090   |          |
| 6  | T                | PYCH_17720 | 1583761..1584165 | 134        | -      | PIN-like  | cd09886   | 57.48    |
|    | A                | PYCH_17710 | 1583428..1583589 | 53         | -      | vapB      | COG3077   |          |
| 7  | T                | PYCH_17720 | 1583761..1584165 | 134        | -      | PIN-like  | cd09886   | 81.40    |
|    | A                | PYCH_17730 | 1584152..1584373 | 73         | -      | RHH-like  | PHA00617  |          |
| 8  | T                | PYCH_18030 | 1611534..1611872 | 112        | -      | vapC      | cd09981   | 39.85    |
|    | A                | PYCH_18040 | 1611833..1612117 | 94         | -      | RHH-like  | COG1753   |          |
| 9  | T                | PYCH_18760 | 1674438..1674839 | 133        | +      | PIN-like  | cd09886   | 75.91    |
|    | A                | PYCH_18750 | 1674185..1674454 | 89         | +      | AbrB-like | COG2002   |          |
| 10 | T                | PYCH_18760 | 1674438..1674839 | 133        | +      | PIN-like  | -         | 47.19    |
|    | A                | PYCH_18770 | 1674851..1675417 | 188        | +      | Xre-like  | -         |          |
| 11 | T                | PYCH_18840 | 1678921..1679298 | 125        | +      | PIN-like  | cd09886   | 74.56    |
|    | A                | PYCH_18830 | 1678712..1678948 | 78         | +      | RHH-like  | COG1753   |          |

18

<sup>a</sup><http://202.120.12.133/TAFinder/index.php>

19

<sup>b</sup>T/A: This shows the type of the protein. T for Toxin and A for Antitoxin.

20

21

22

**Table S2. Type II TA systems in *P. furiosus* were identified using TAffinder<sup>a</sup>**

23

**Sequence Name:** *Pyrococcus furiosus* DSM 3638 chromosome, complete genome

| #  | T/A <sup>b</sup> | Locus tag | Location         | Len (a.a.) | Strand | Family    | Domain    | Score_TA |
|----|------------------|-----------|------------------|------------|--------|-----------|-----------|----------|
| 1  | T                | PF0233    | 244161..245558   | 465        | +      | -         | pfam00583 | 8.88     |
|    | A                | PF0232    | 243538..244101   | 187        | +      | -         | cd00090   |          |
| 2  | T                | PF0355    | 367848..368303   | 151        | -      | vapC      | cd09981   | 99.99    |
|    | A                | PF0355.1n | 368300..368509   | 69         | -      | vapB      | COG1753   |          |
| 3  | T                | PF0574    | 594811..595212   | 133        | +      | vapC      | COG5611   | 99.99    |
|    | A                | PF0573    | 594596..594823   | 75         | +      | vapB      | COG2002   |          |
| 4  | T                | PF0575    | 595671..596009   | 112        | -      | vapC      | -         | 99.99    |
|    | A                | PF0576    | 596048..596188   | 46         | -      | vapB      | -         |          |
| 5  | T                | PF0773    | 765121..765216   | 31         | -      | vapC      | -         | 99.99    |
|    | A                | PF0774    | 765189..765497   | 102        | -      | vapB      | -         |          |
| 6  | T                | PF0776    | 765933..766259   | 108        | +      | PIN-like  | -         | 99.99    |
|    | A                | PF0775    | 765537..765860   | 107        | +      | RHH-like  | -         |          |
| 7  | T                | PF0778    | 767181..767360   | 59         | -      | PIN-like  | -         | 76.11    |
|    | A                | PF0776.1n | 766956..767174   | 72         | -      | vapB      | -         |          |
| 8  | T                | PF0778    | 767181..767360   | 59         | -      | PIN-like  | -         | 99.99    |
|    | A                | PF0779    | 767357..767491   | 44         | -      | AbrB-like | -         |          |
| 9  | T                | PF0812    | 794106..794522   | 138        | -      | vapC      | cd09886   | 99.99    |
|    | A                | PF0813    | 794519..794749   | 76         | -      | vapB      | COG2002   |          |
| 10 | T                | PF0839    | 813549..813929   | 126        | +      | vapC      | -         | 99.99    |
|    | A                | PF0838    | 813298..813549   | 83         | +      | vapB      | -         |          |
| 11 | T                | PF0944    | 909057..909425   | 122        | +      | MNT-like  | -         | 99.99    |
|    | A                | PF0943    | 908759..909094   | 111        | +      | HEPN-like | -         |          |
| 12 | T                | PF1206    | 1147304..1147774 | 156        | -      | vapC      | cd09981   | 99.99    |
|    | A                | PF1207    | 1147771..1148001 | 76         | -      | vapB      | COG1753   |          |
| 13 | T                | PF1223    | 1159977..1160348 | 123        | +      | PIN-like  | cd09981   | 99.99    |
|    | A                | PF1222    | 1159693..1160004 | 103        | +      | RHH-like  | COG1753   |          |
| 14 | T                | PF1225    | 1161130..1161417 | 95         | -      | MNT-like  | -         | 73.11    |
|    | A                | PF1224    | 1160968..1161111 | 47         | -      | vapB      | -         |          |
| 15 | T                | PF1322    | 1244575..1244805 | 76         | +      | -         | -         | 99.99    |
|    | A                | PF1323    | 1244802..1245029 | 75         | +      | hicB      | -         |          |
| 16 | T                | PF1352    | 1270974..1271378 | 134        | -      | vapC      | cd09886   | 99.99    |
|    | A                | PF1353    | 1271365..1271586 | 73         | -      | vapB      | PHA00617  |          |
| 17 | T                | PF1600    | 1492512..1493033 | 173        | -      | -         | pfam13420 | 10.21    |
|    | A                | PF1601    | 1493159..1493584 | 141        | -      | -         | cd00090   |          |
| 18 | T                | PF2057    | 1897201..1897371 | 56         | -      | PIN-like  | -         | 99.99    |
|    | A                | PF2058    | 1897530..1897727 | 65         | -      | AbrB-like | -         |          |

24

<sup>a</sup><http://202.120.12.133/TAfinder/index.php>

25

<sup>b</sup>T/A: This shows the type of the protein. T for Toxin and A for Antitoxin.

26

27 Fig S1. A. Sketch map of primers designed for detection of co-transcription. B. The PCR analysis  
 28 of co-transcription of the three hypothetical pressure related genes. Lane DNA is positive control;  
 29 Lane RNA is negative control; Lane cDNA is the result of co-transcription.

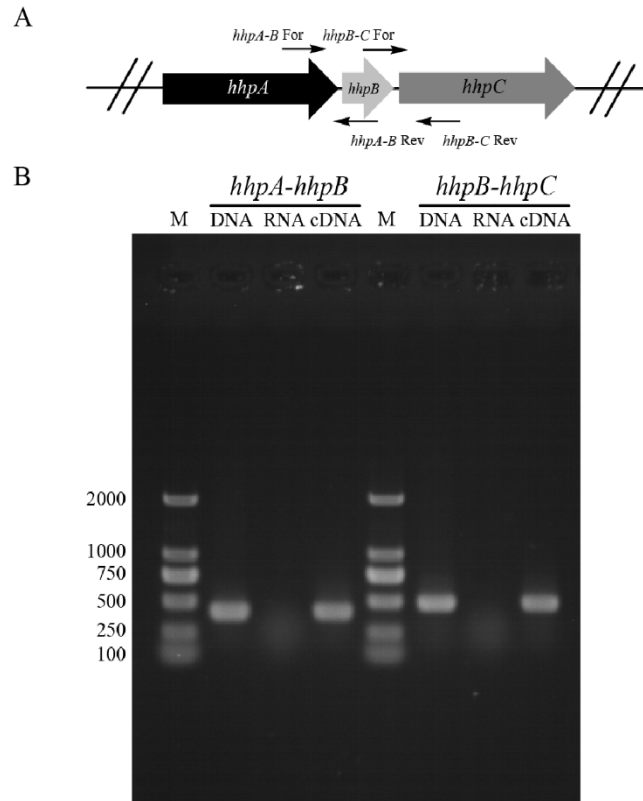

30  
 31  
 32

33 Fig S2. The biomass of recombinant strains with different toxins at different pressures.  
34 A1/pLMOS507Tpy, A1/pLMOS1312Tpy, A1/pLMOS1772Tpy, and A1/pLMOS944Tpf are strain  
35 A1 containing plasmids pLMOS507Tpy, pLMOS1312Tpy, pLMOS1772Tpy and pLMOS944Tpf,  
36 respectively. Toxins PYCH\_05070, PYCH\_13120 and PYCH\_17720 are from *P. yayanosii*. Toxin  
37 PF0944 of *P. furiosus* has 64% amino acid sequence identity with its homologue of *P. yayanosii*.  
38 Black represents the biomass of strains at atmospheric pressure. Blank represent the biomass of  
39 strains at 52 MPa. The results are from three independent experiments, and the error bars represent  
40 the standard deviations. \*p < 0.05; \*\*p < 0.01.

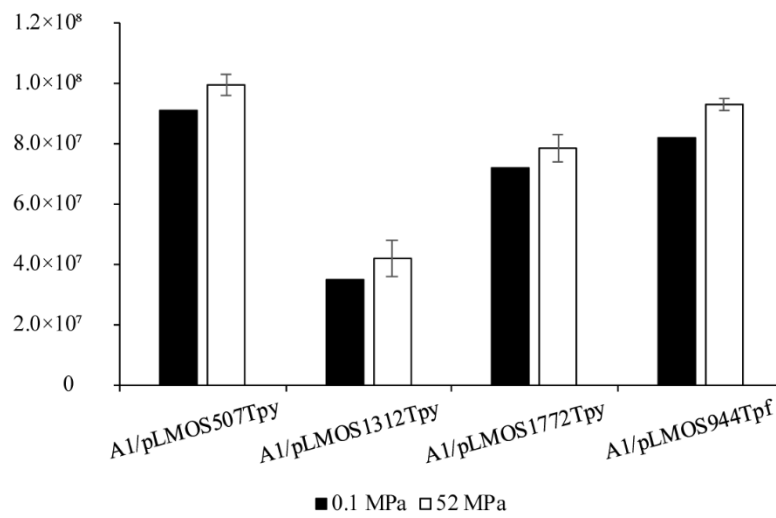

41  
42

43 Fig S3. PCR analyses of the PYCH<sub>13690</sub> loci confirming gene disruption. A. Primers PYCH<sub>1369</sub>-  
44 F/R were designed in the internal regions of gene(s) to be disrupted. B. Primers 1369-F/R were  
45 designed in the internal regions of gene(s) to be disrupted. C. Primers PYCH<sub>1369</sub>-up-F/  
46 PYCH<sub>1369</sub>-dw-R were designed in the 5' and 3' flanking regions of the upstream and downstream  
47 fragments of gene(s) to be disrupted. D. Primers 1369ud-F/R were designed in the 5' and 3' flanking  
48 regions of the upstream and downstream fragments of gene(s) to be disrupted. M, 1-kb marker; 1,  
49 wild type strain A1; 2-34, single colonies cultured in normal TRM liquid medium after second  
50 recombination at 52 MPa; 35-44, single colonies cultured in normal TRM liquid medium after  
51 second recombination at 45 MPa; 45, the first recombinant strain cultured in normal TRM liquid  
52 medium.

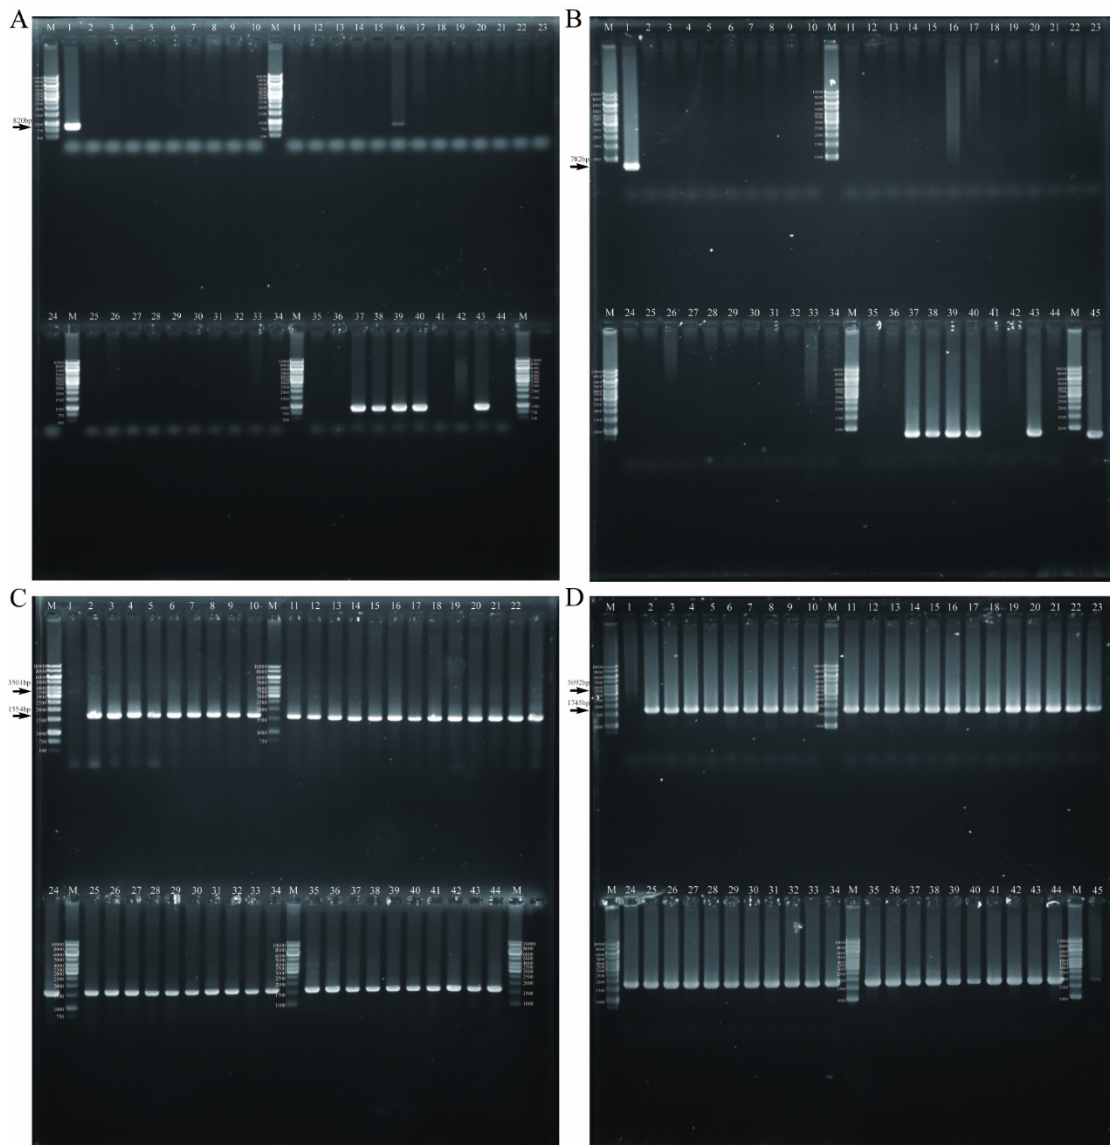

53

54

55 Fig S4. Biomass of the strain A1 and the auxotrophic strains As1 and A2. A. Biomass of the strains  
 56 cultured in TRM with 1 mg/ml 5-FOA. B. Biomass of the strains cultured in TRM; the auxotrophic  
 57 strains As1 and A2 were supplemented with 10  $\mu$ g/ml uracil and 1 mg/ml 5-FOA. \*p < 0.05; \*\*p <  
 58 0.01.

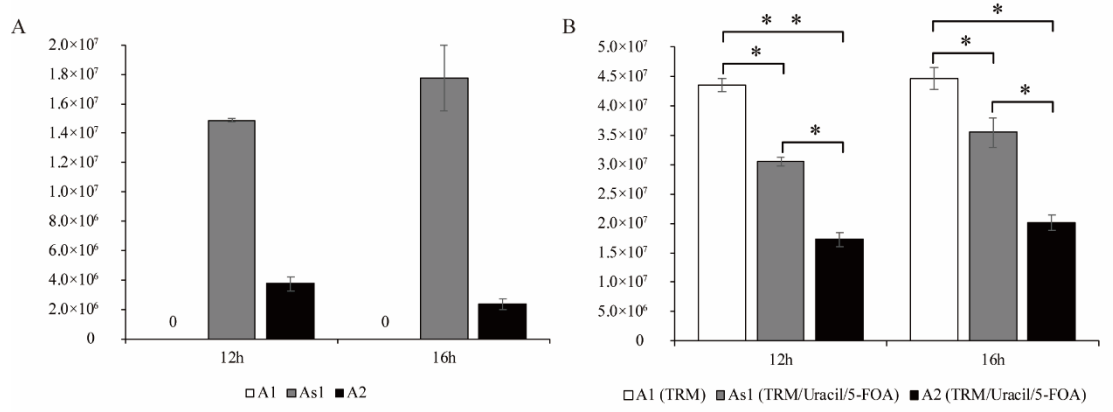

59  
 60
